# Supplementary material for: Mitochondrial dysfunction in some triple-negative breast cancer cell lines: role of mTOR pathway and therapeutic potential
Source: PubMed Central journal article supplement (PMC4303115; doi:10.1186/s13058-014-0434-6), 2014-09-11
Supplement: 13058_2014_434_MOESM3_ESM.pdf [file 13058_2014_434_MOESM3_ESM.pdf]

## Additional File 2

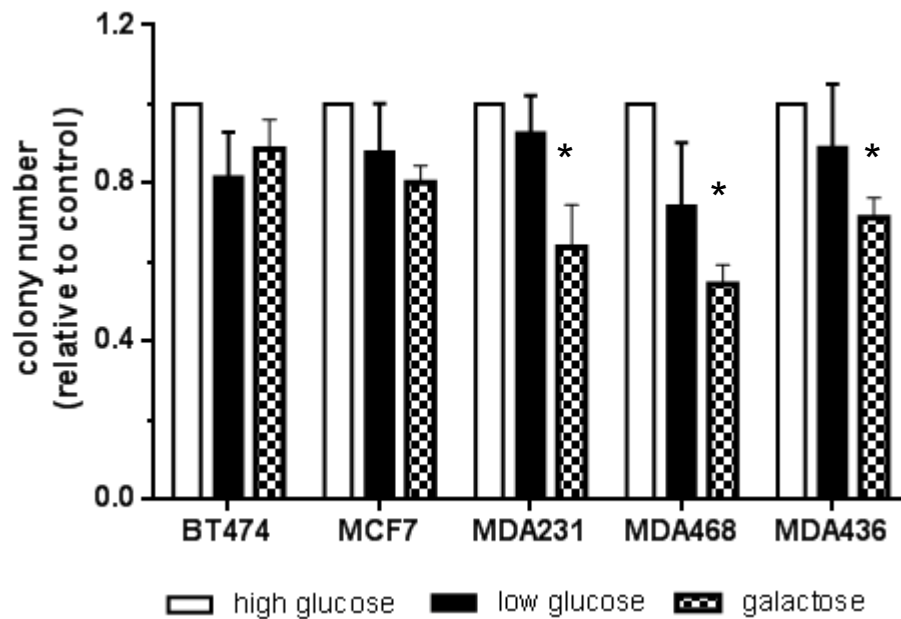

**Figure S2. Effect of sugar on TNBC cell proliferation.** Breast cancer cells (3000 cells) were plated in soft agar with DMEM containing high glucose (3.15 g/L) or low glucose (1g/L), or in DMEM media containing galactose (3.15g/L) without glucose. After 4 weeks, cell colonies were stained and counted. Each data point represents the mean  $\pm$  S.D. (n = 3). \*, p<0.05
