# Supplementary material for: Mitochondrial dysfunction in some triple-negative breast cancer cell lines: role of mTOR pathway and therapeutic potential
Source: PubMed Central journal article supplement (PMC4303115; doi:10.1186/s13058-014-0434-6), 2014-09-11
Supplement: 13058_2014_434_MOESM4_ESM.pdf [file 13058_2014_434_MOESM4_ESM.pdf]

## Additional File 3

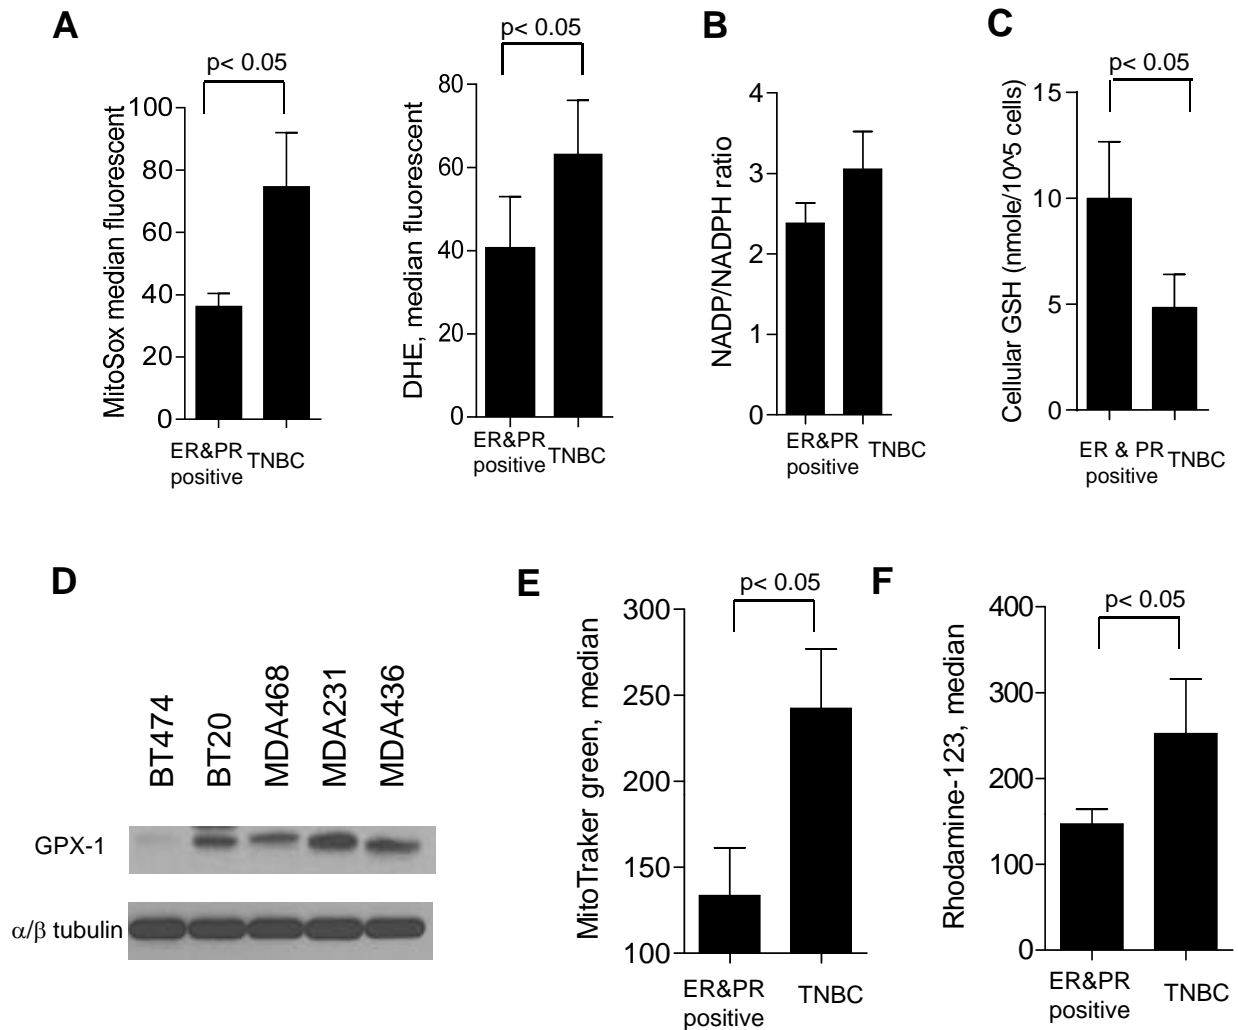

**Figure S3. Characterization of TNBC cells.** (A) Levels of ROS in breast cancer cells assessed by MitoSOX™ Red (Mitosox, left panel) and by dihydroethidium (DHE, right panel). (B) Comparison of NADP<sup>+</sup>/NADPH ratios in breast cancer cell lines between the TNBC group and the ER/PR-positive group. (C) GSH level is lower in TNBC cells compared to ER-PR positive cells. (D) Overexpression of GPX-1 in TNBC cells determined by western blot compare to ER-PR positive cells (BT474). One representative from at least three independent experiments is shown. (E) TNBC cells exhibit a higher mitochondrial mass compare to ER-PR positive cells. (F) TNBC cells exhibit a higher mitochondrial membrane potential compare to ER-PR positive cells. The bar graph represents mean  $\pm$  SD from three experiments. Note: TNBC cell lines included BT20, MDA468, MDA231, MDA436; ER/PR-positive cell lines included BT474, MCF7, T47D, ZR751.
