# Supplementary material for: Mitochondrial dysfunction in some triple-negative breast cancer cell lines: role of mTOR pathway and therapeutic potential
Source: Springer Nature journal article supplement (doi:10.1186/s13058-014-0434-6), 2014-09-10
Supplement: MOESM1 [file 9781170]

Table 1: Quantification Figure 2B normalized by its own tubulin

|              | BT474 | MCF7 | TD47 | ZR751 | SKB3 | BT20 | MDA468 | MDA231 | MDA436 |
|--------------|-------|------|------|-------|------|------|--------|--------|--------|
| complex V    | 0.84  | 0.92 | 1.04 | 0.96  | 0.93 | 0.93 | 0.81   | 0.75   | 0.84   |
| complex III  | 0.70  | 0.75 | 0.83 | 0.78  | 0.65 | 0.70 | 0.36   | 0.36   | 0.48   |
| complex II   | 1.01  | 1.02 | 1.08 | 1.03  | 0.90 | 0.98 | 0.94   | 0.91   | 0.91   |
| complex IV   | 0.90  | 0.93 | 0.85 | 0.90  | 0.77 | 0.80 | 0.78   | 0.75   | 0.77   |
| complex I    | 0.66  | 0.72 | 0.67 | 0.68  | 0.58 | 0.59 | 0.58   | 0.44   | 0.57   |
| cytochrome C | 0.61  | 0.70 | 0.75 | 0.58  | 0.65 | 0.66 | 0.74   | 0.74   | 0.78   |
| SCO2         | 0.87  | 0.90 | 0.62 | 0.89  | 0.57 | 0.27 | 0.91   | 0.91   | 0.90   |

Table 2: Quantification Figure 2C normalized by its own tubulin

|       | BT474 | MCF7 | TD47 | ZR751 | SKB3 | BT20 | MDA468 | MDA231 | MDA436 |
|-------|-------|------|------|-------|------|------|--------|--------|--------|
| PDH   | 0.23  | 0.22 | 0.83 | 0.76  | 0.76 | 0.78 | 1.02   | 0.86   | 0.81   |
| HDK1  | 0.87  | 0.89 | 0.77 | 0.73  | 0.72 | 0.71 | 0.78   | 0.82   | 0.96   |
| HDKII | 0.38  | 0.43 | 0.35 | 0.40  | 0.44 | 0.54 | 0.71   | 0.81   | 0.72   |
| Glut1 | 0.82  | 0.79 | 0.90 | 0.85  | 0.74 | 0.77 | 0.96   | 0.93   | 0.87   |
| Glut4 | 0.94  | 0.85 | 0.94 | 0.85  | 0.61 | 0.74 | 1.01   | 1.04   | 1.13   |
| LDH-A | 0.78  | 0.78 | 0.89 | 0.85  | 0.92 | 0.85 | 0.82   | 0.87   | 0.77   |
| PKM2  | 0.89  | 0.89 | 0.87 | 0.91  | 0.94 | 1.02 | 0.96   | 1.07   | 0.82   |
| AKT-P | 0.36  | 0.36 | 0.91 | 0.35  | 0.36 | 0.96 | 1.13   | 0.35   | 1.00   |
| AKT-t | 0.98  | 1.05 | 0.82 | 0.94  | 0.90 | 0.96 | 1.01   | 0.97   | 1.03   |

Table 3: Quantification Figure 2D normalized by its own GAPDH

|      | BT474 | MCF7 | TD47 | ZR751 | SKB3 | BT20 | MDA468 | MDA231 | MDA436 |
|------|-------|------|------|-------|------|------|--------|--------|--------|
| PDK1 | 0.41  | 0.38 | 1.22 | 1.14  | 1.33 | 1.67 | 1.48   | 1.49   | 1.58   |

Table 4: Quantification Figure 2E normalized by its own tubulin

|              | BT474 | MCF7 | TD47 | ZR751 | SKB3 | BT20 | MDA468 | MDA231 | MDA436 |
|--------------|-------|------|------|-------|------|------|--------|--------|--------|
| AMPK total   | 0.74  | 0.83 | 0.52 | 0.71  | 0.76 | 0.60 | 0.71   | 0.89   | 0.93   |
| AMPK-P       | 0.26  | 0.23 | 1.14 | 0.23  | 0.80 | 0.65 | 0.93   | 1.10   | 1.16   |
| P70S6K total | 0.65  | 0.57 | 0.40 | 0.49  | 0.37 | 0.27 | 0.28   | 0.27   | 0.27   |
| P70S6K-P     | 0.86  | 0.72 | 0.47 | 0.70  | 0.25 | 0.27 | 0.31   | 0.24   | 0.23   |

Table 5: Quantification Figure 2F normalized by its own GAPDH

|        | BT474 | MCF7 | TD47 | ZR751 | SKB3 | BT20 | MDA468 | MDA231 | MDA436 |
|--------|-------|------|------|-------|------|------|--------|--------|--------|
| P70S6K | 0.97  | 0.95 | 0.92 | 0.92  | 0.95 | 0.99 | 0.94   | 0.95   | 0.91   |

Table 6: Quantification Figure 3B normalized by its own  $\beta$ -actin

| time,h   | 0    | 2    | 4    | 8    | 16   | 24   |
|----------|------|------|------|------|------|------|
| p70S6K-P | 1.01 | 0.39 | 0.35 | 0.31 | 0.34 | 0.38 |

Table 7: Quantification Figure 3C normalized by its own AMPK total

|       | BT474 |      | MCF7 |      | MDA468 |      | MDA231 |      |
|-------|-------|------|------|------|--------|------|--------|------|
| AICAR | 0.00  | 1mM  | 0.00 | 1mM  | 0.00   | 1mM  | 0.00   | 1mM  |
|       | 0.66  | 1.05 | 0.55 | 1.02 | 0.74   | 1.05 | 0.74   | 0.92 |

Table 8: Quantification Figure 3D normalized by its own  $\beta$ -actin

|              | MDA468 | MDA468-p70S6K | MDA468-vector |
|--------------|--------|---------------|---------------|
| P70S6K-P     | 1.3    | 1.42          | 1             |
| P70S6K-total | 0.61   | 0.69          | 0.72          |

Table 9: Quantification Figure 3E normalized by its own  $\beta$ -actin

|        | shRNAFF3 | BT474 | shRNAD7 | shRNAB8 |
|--------|----------|-------|---------|---------|
| p70S6K | 0.92     | 0.90  | 0.70    | 0.65    |

Table 10: Quantification Figure 4A normalized by its own  $\beta$ -actin

|              |      |      |      |      |      |      |      |      |
|--------------|------|------|------|------|------|------|------|------|
| Herceptin    | -    | +    | -    | -    | -    | +    | +    | +    |
| 4-HOT        | -    | -    | +    | -    | +    | +    | -    | +    |
| RU486        | -    | -    | -    | +    | +    | -    | +    | +    |
| AMPK-P       | 0.89 | 1.52 | 1.11 | 1.11 | 1.01 | 1.38 | 1.53 | 1.50 |
| AMPK total   | 1.29 | 1.62 | 1.37 | 1.16 | 1.08 | 1.33 | 1.23 | 1.26 |
| p70S6K-P     | 1.32 | 1.28 | 1.18 | 1.17 | 1.07 | 1.08 | 1.07 | 1.06 |
| p70S6K total | 1.24 | 1.29 | 1.24 | 1.12 | 1.08 | 1.20 | 1.22 | 1.25 |

Table 11: Quantification Figure 6B normalized by its own  $\beta$ -actin

|      | MCF7    |            |               | MDA436  |            |               |
|------|---------|------------|---------------|---------|------------|---------------|
|      | control | HKII siRNA | control shRNA | control | HKII siRNA | control shRNA |
| HKII | 0.98    | 0.15       | 0.94          | 1.37    | 0.17       | 1.28          |

Table 12: Quantification Figure S3D normalized by its own  $\beta$ -actin

|      | BT474 | BT20 | MDA468 | MDA231 | MDA436 |
|------|-------|------|--------|--------|--------|
| GPX1 | 0.51  | 0.80 | 0.80   | 0.94   | 0.89   |
