# Supplementary material for: Mitochondrial dysfunction in some triple-negative breast cancer cell lines: role of mTOR pathway and therapeutic potential
Source: Springer Nature journal article supplement (doi:10.1186/s13058-014-0434-6), 2014-09-10
Supplement: MOESM7 [file 9781170]

## Additional File 6

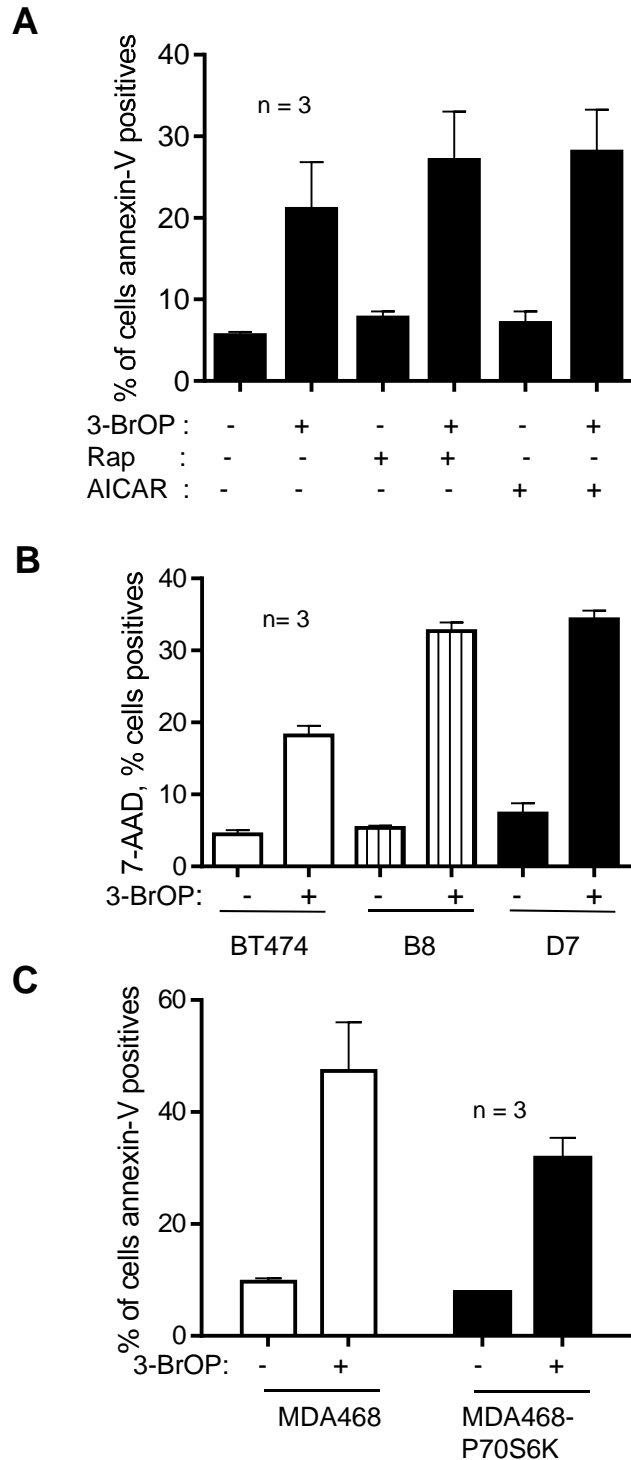

**Figure S6. Sensitization of breast cancer cells to glycolysis inhibition.** (A) Inhibition of mTOR and activation of AMPK render BT474 cells more sensitive to glycolysis inhibition. (B) BT474 cells become more sensitive to 3-BrOP after P70S6K shRNA knockdown. (C) Over-expression of P70S6K in MDA468 (TNBC) cells render cells less sensitive to glycolysis inhibition by 3-BrOP .
